# Supplementary material for: Effect of ultrasonography and fluoroscopic guidance on the incidence of complications of cannulation in extracorporeal cardiopulmonary resuscitation in out-of-hospital cardiac arrest: a retrospective observational study
Source: PubMed Central journal article supplement (PMC5267374; doi:10.1186/s12871-016-0293-z), 2017-01-06
Supplement: 12871_2016_293_MOESM1_ESM.pdf [file 12871_2016_293_MOESM1_ESM.pdf]

## Supplementary material. Cannulation method details of two groups.

### Comparison group (ultrasound guided percutaneous cannulation)

1. Femoral vessels are punctured by an 18G puncture needle while confirming with linear-type probe, in parallel with standard cardiopulmonary resuscitation continued as possible.

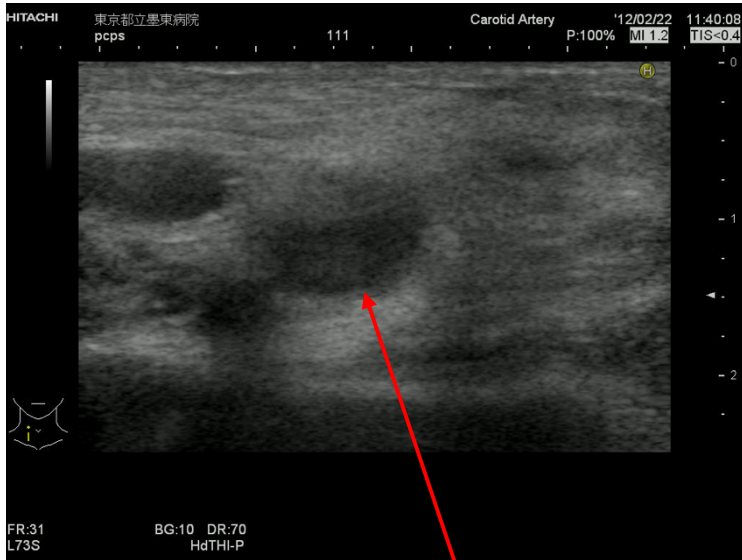

Femoral vein

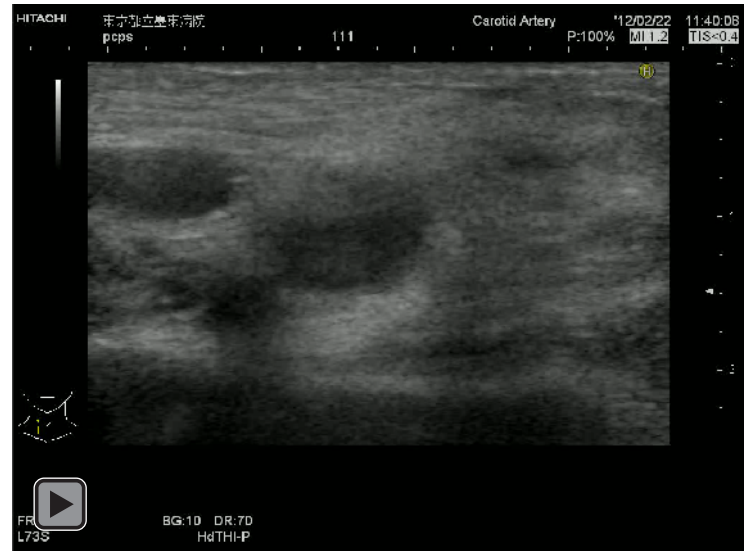

Video (requirement of Acrobat Reader 9 or later)

2. Guiding wire and cannula were inserted to appropriate position using sector type probe.

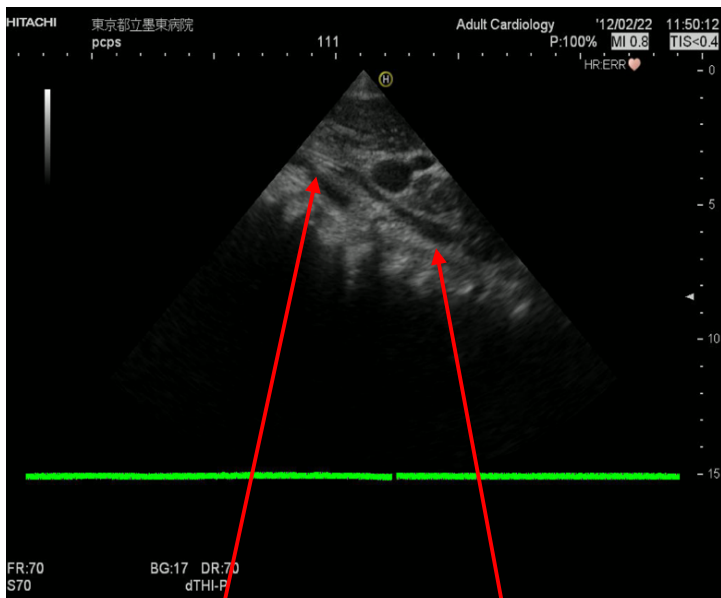

Guiding wire

Inferior vena cava

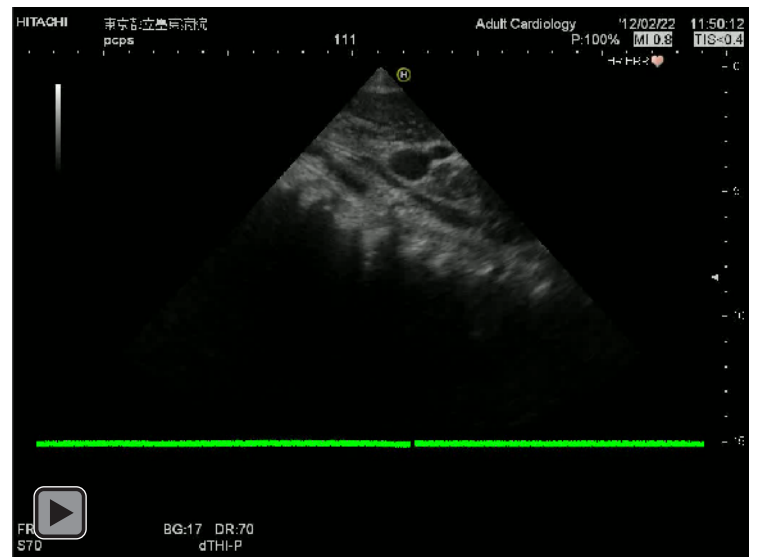

Video (requirement of Acrobat Reader 9 or later)

**Exposure group (ultrasound and fluoroscopy guided percutaneous cannulation)**

1. Femoral vessels are punctured using linear type ultrasonic probe as with comparison group.
2. Guiding wire is inserted to appropriate position using fluoroscopy.

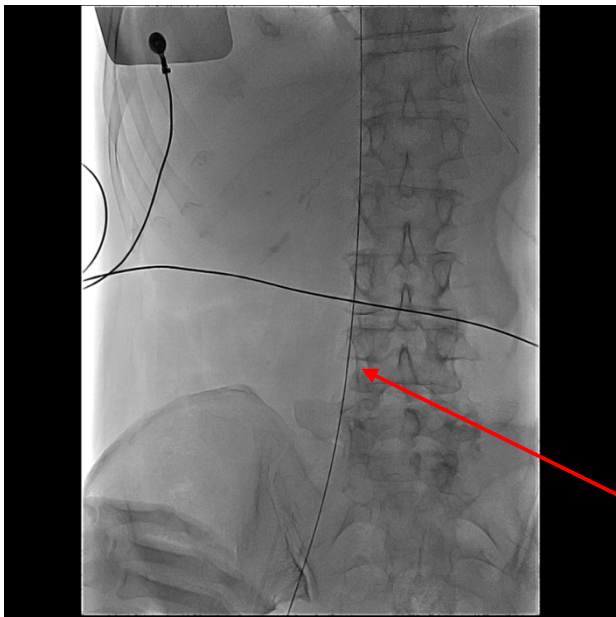

**Guiding wire**

3. The punctured site is dilated using a dilator; the direction of the dilator was matched with the direction of the guiding wire using fluoroscopy.

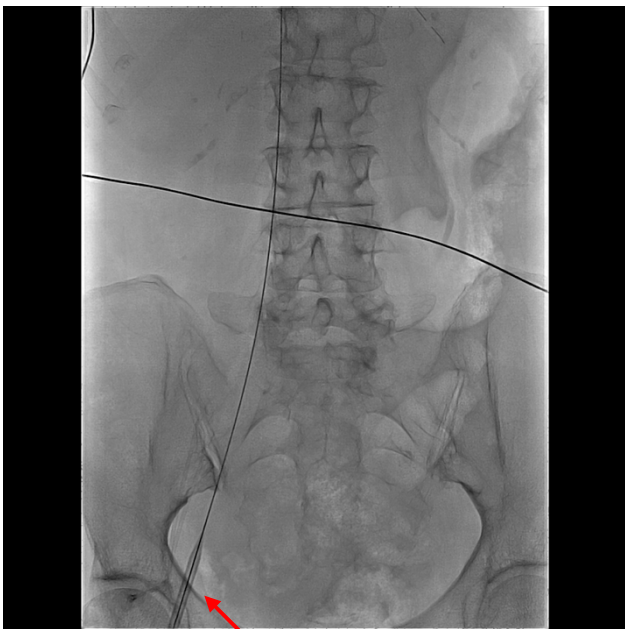

**Appropriate dilator direction**

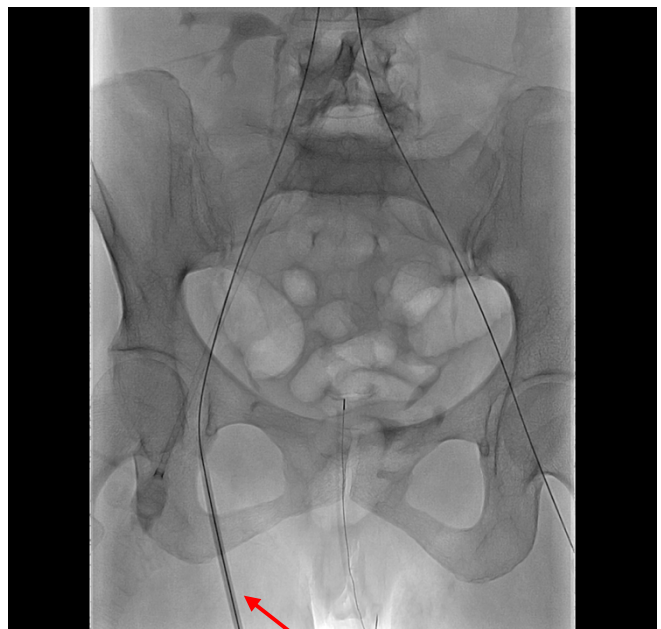

**Wrong dilator direction**

4. The position of cannula is confirmed using fluoroscopy.

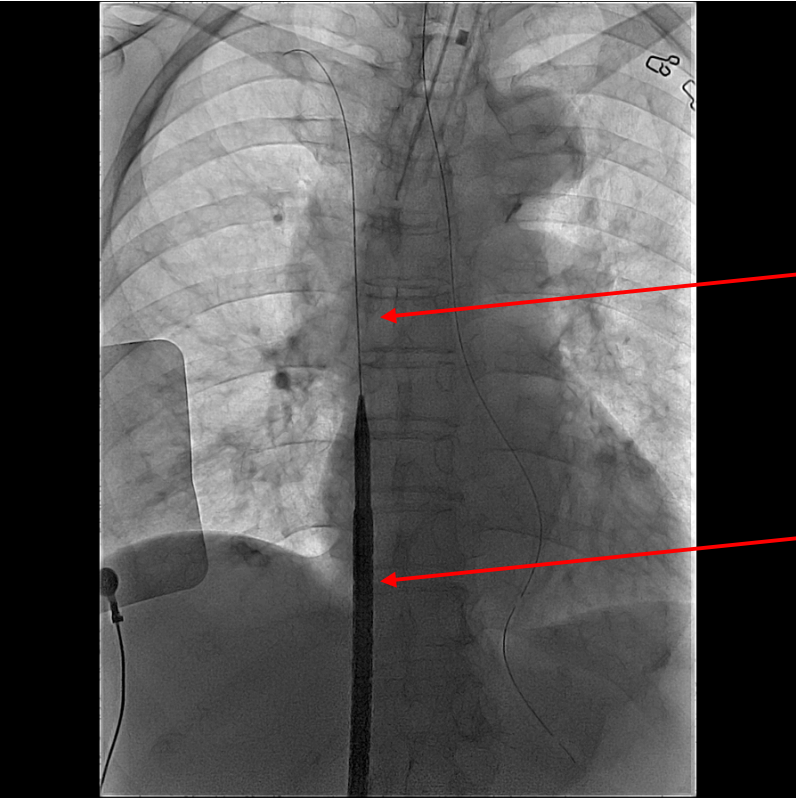

**Guiding wire**

**Inflow cannula**
